# Supplementary material for: The formation and composition of the Mount Everest plume in winter
Source: Copernicus journal article supplement (doi:10.5194/acp-22-7995-2022), 2022-06-21
Supplement: Supplementary file 1 [file acp-22-7995-2022-supplement.zip]

Archive with 6 entries (6 files):
- Movie 2.mp4
- Movie 5.mp4
- Movie 3.mp4
- Movie 4.mp4
- Movie 1.mp4
- acp-22-7995-2022-supplement-title-page.pdf
