# Supplementary material for: The formation and composition of the Mount Everest plume in winter
Source: Copernicus journal article supplement (doi:10.5194/acp-22-7995-2022), 2022-06-21
Supplement: Supplementary file 1 [file acp-22-7995-2022-supplement.zip › acp-22-7995-2022-supplement-title-page.pdf]

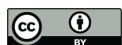

## *Supplement of*

# **The formation and composition of the Mount Everest plume in winter**

**Edward E. Hindman and Scott Lindstrom**

*Correspondence to:* Edward E. Hindman (ehindman@ccny.cuny.edu)

- [acp-22-7995-2022-supplement-title-page.pdf](#)
- [Movie 1.mp4](#)
- [Movie 2.mp4](#)
- [Movie 3.mp4](#)
- [Movie 4.mp4](#)
- [Movie 5.mp4](#)

The copyright of individual parts of the supplement might differ from the article licence.
